# Supplementary material
Source: publisher site journal article supplement (http://www.degruyter.com/publication/journal_key/ISS/downloadAsset/ISS_For_authors%2F_Quick_Checklist_Submission%2F.pdf)
Supplement: Supplementary file 1 [file ISS_For_authors%2F_Quick_Checklist_Submission%2F.pdf]

# INNOVATIVE SURGICAL SCIENCES (ISS)

## THE RAPID JOURNAL OF THE GERMAN SOCIETY OF SURGERY

### QUICK CHECKLIST - SUBMISSION

Submit your manuscript for **Innovative Surgical Sciences – ISS** via our submission and peer review system ScholarOne Manuscripts. Before submitting an article, ensure that it is in accordance with our [Publication Ethics and Publication Malpractice Statement](#) and meets all requirements listed, as well as those in the [Quick Checklist: Main Document](#). For further information, refer to the [Information for Authors](#).

#### AUTHOR INFORMATION

Please be aware that all information on authors have to be entered into the system properly upon submission. Only the names provided here will be listed in an eventually accepted manuscript.

#### MAIN DOCUMENT

Use the provided template for the respective article type (go to 'Supplementary Information' on the [journal website](#)). Provide us with a separate title page file containing the concise title and a shortened version as a running head. Give the full name (given name, middle initials and family name), affiliation (department, institute, city, country) and an email address for each author and additionally phone number for the corresponding author. Include the keywords, main body, text, references, figures, tables and respective legends, in a single manuscript file (stick to the formatting of the template to ensure a clear hierarchy of the text). Make sure, that the manuscript file is anonymized and all figures, tables and possible supplemental data are mentioned in the main text.

#### IMAGE FILES

Upload all figures additionally as separate source files (e.g. as .tiff, .jpg).

#### SUPPLEMENTAL MATERIAL

Upload any supplemental material as a separate file. If images are part of the supplemental material, the source files do not have to be uploaded separately. Please be aware, that our typesetting vendor does not edit supplemental material. Therefore, any revised version of the supplemental material has to be provided in two versions during the peer review process – one version with changes highlighted for review purposes, and the second version in the final layout ready to be published.

#### ETHICAL AND AUTHOR STATEMENTS

- **Author disclosure form:** The [disclosure form of potential conflicts of interest](#) needs to be filled out by the submitting author on behalf of all others and uploaded at the time of the submission.
- **Author statements template:** The [Ethical and Legal Declarations form](#) needs to be customized and uploaded as a separate file at the time of the original submission. Instructions on how to make declarations can be found [here](#).

#### PERMISSIONS

Written permission from the copyright holder is required to reproduce any copyrighted material. Upload any permissions received separate files.

Identities of subjects must be protected. Therefore, informed consent must be obtained whenever authors intend to include images, case details or other personal information of patients or any other individuals. Authors must be able to provide signed consent forms upon request by the publisher.

#### METADATA (TO BE ENTERED INTO THE SUBMISSION SYSTEM)

- **Manuscript information:** Give the title, running head, abstract, and keywords. Give the full name, affiliation, and a valid email address for each author.
- **Cover letter:** Introduce yourself and briefly emphasize the relevance and importance of your work.
- **Suggested/Opposed reviewer:** Include your suggestions for impartial referees and/or editorial board member(s) to assess your manuscript. Note, those with whom you have a conflict of interest.

#### SUBMIT ALL FILES THROUGH SCHOLARONE MANUSCRIPTS™.
